# Supplementary material for: Exploration of nucleosome positioning patterns in transcription factor function
Source: PubMed Central journal article supplement (PMC4726364; doi:10.1038/srep19620), 2016-01-21
Supplement: srep19620-s1.pdf [file srep19620-s1.pdf]

## SUPPLEMENTARY FIGURES

### **Exploration of nucleosome positioning patterns in transcription factor function**

Kazumitsu Maehara<sup>1</sup> and Yasuyuki Ohkawa<sup>1\*</sup>

<sup>1</sup>Department of Advanced Medical Initiatives, JST-CREST, Faculty of Medical Sciences, Kyushu University, 3-1-1 Maidashi, Higashi-ku, Fukuoka, Fukuoka 812-8582, Japan.

\*To whom correspondence should be addressed. Tel: +81-92-642-6216; Fax: +81-92-642-6099; Email: yohkawa@epigenetics.med.kyushu-u.ac.jp

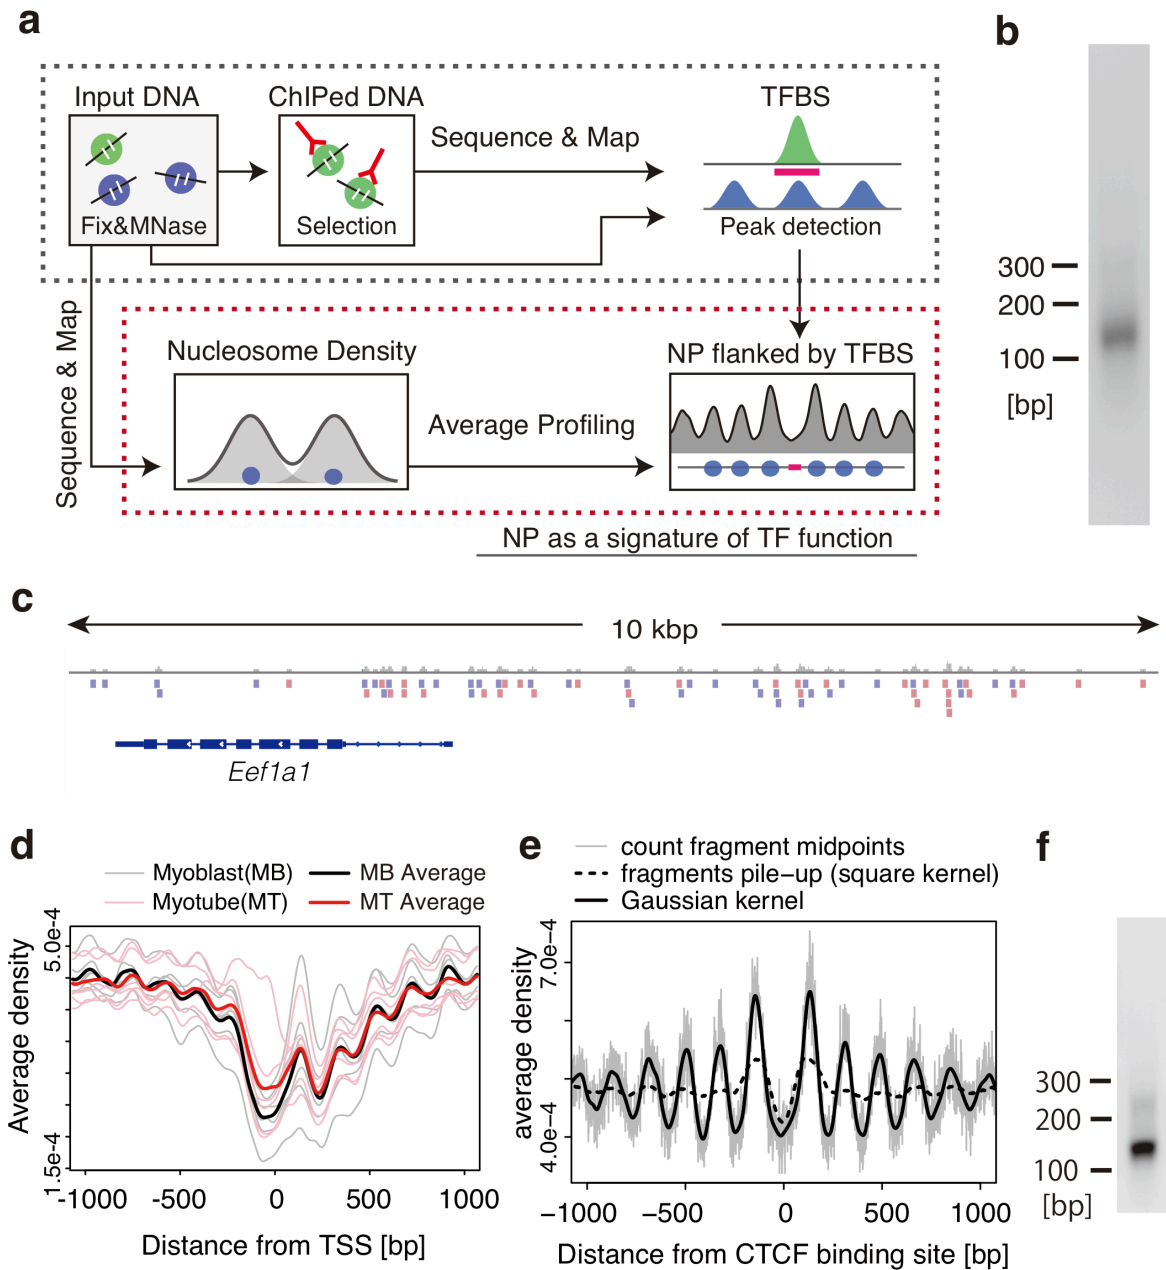

**Figure S1 | Nucleosome density estimates.**

(a) Schematic depiction of the work flow for average nucleosome density estimation. First, chromatin is fixed and digested by MNase to obtain mono-nucleosome sized DNA fragments. The samples are deproteinized, deep sequenced and the DNA mapped onto the reference genome. Next, the nucleosome detection frequency is averaged at all defined anchor points (e.g. TSSs, TFBSs). Finally, NP is predicted by the smoothed density profile of the nucleosomes.

**(b)** DNA fragment size of the ChIP-Seq (RNAP2-S5ph) samples. DNA fragments of mono-nucleosome size ( $164 \pm 12$  bp; mean  $\pm$  standard deviation) were obtained.

**(c)** Mapped sequence reads around the *Eef1a1* gene locus. An example of mapped deep sequence reads of fixed MNase-Seq at the *Eef1a1* locus is shown. The blue/red boxes indicate the forward/reverse stranded mapped reads, respectively, on the mouse genome. **(d)**

Nucleosome densities around TSSs determined by Asp et al. using Mnase-digested input control DNA from ChIP-Seq analysis of C2C12 cells. Myotube and myoblast replicates (thin pink/grey lines) are shown together. Each average density is shown as bold red/black lines.

**(e)** Nucleosome densities around the CTCF binding site. Comparisons of NP estimates using a simple count of the fragment mid-point (grey), fragments pile-up (dotted), or smoothed fragment mid-point by a Gaussian kernel (solid). TFBS data were obtained from the ENCODE project. **(f)** DNA fragments of non-fix samples were of mono-nucleosome size ( $154 \pm 11$  bp).

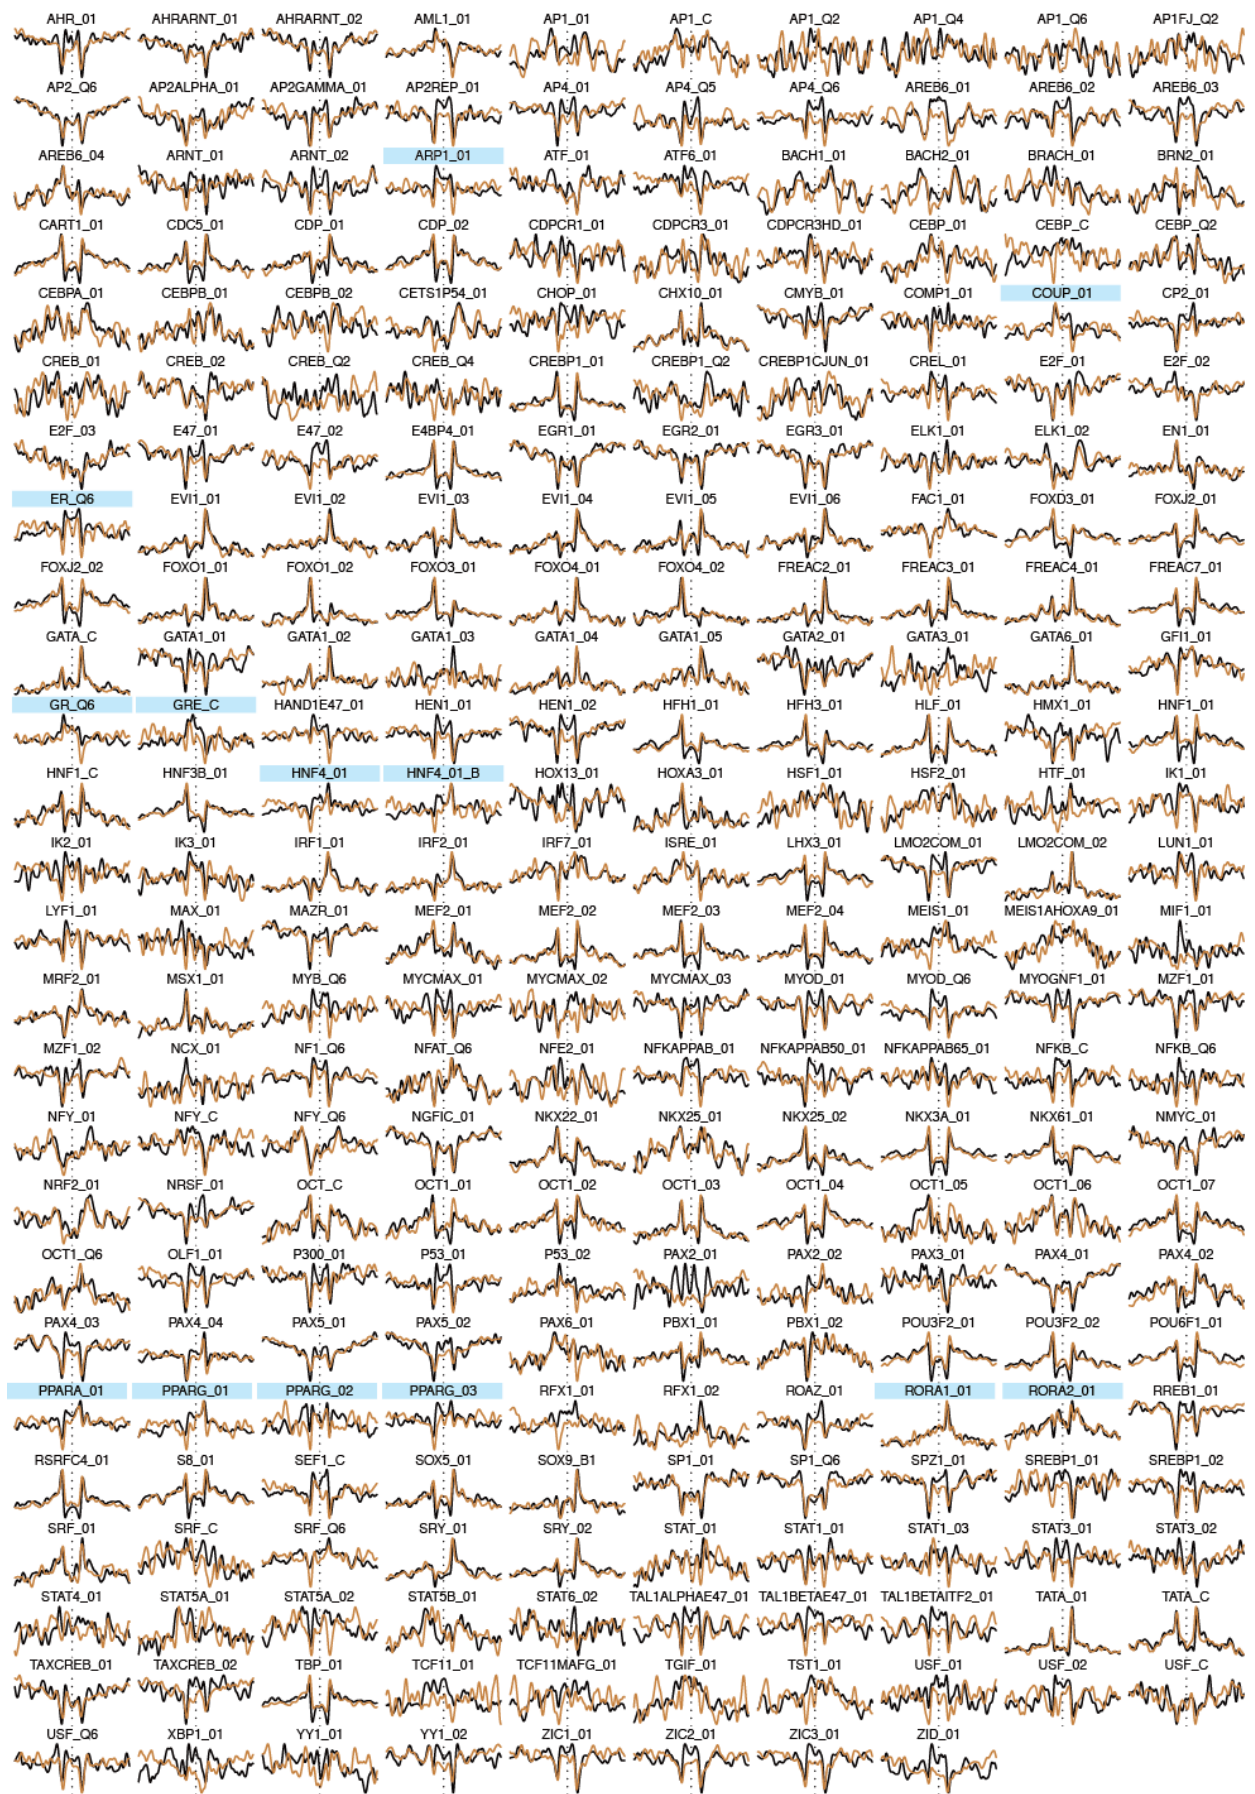

## Figure S2 | PANDs of 258 TRANSFAC *cis*-regulatory elements.

PANDs of +/-500 bp from the *cis*-regulatory element center of 258 types of TFBS. Coordinate axes are omitted to show only the shapes of the PANDs. Black and brown lines indicate myoblast and myotube PANDs, respectively. The labels highlighted in blue indicate nuclear receptors.

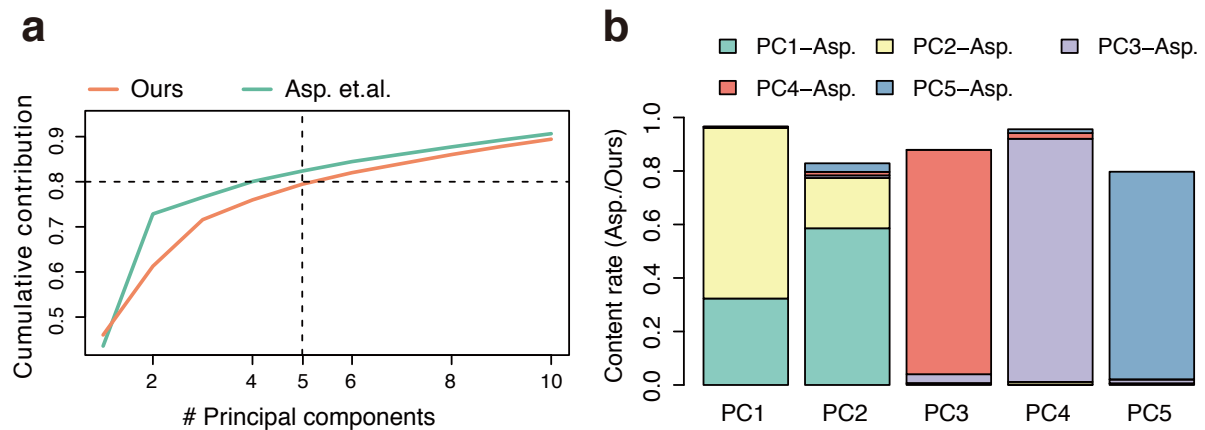

## Figure S3 | Similar NP patterns were extracted from different data set of mouse C2C12 cells

(a) The top five PCs reached a ~80% cumulative contribution rate. The x-axis is the number of PCs used and the y-axis is the cumulative contribution rate. The orange line is our MNase-Seq data and the green line is from the data of Asp et al. The dotted lines indicate five PCs (vertical) and the contribution rate of 0.8 (horizontal).

(b) The similarity between PCs was measured by dot product between PC vectors from our data (PC1-5) and the data of Asp et al. (PC1'-5'). Each height of a vertical bar labelled PC1-5 indicates the sum of squared values of dot product (max: 1.0) between PC1 vs. PC1'-5', PC2 vs. PC1'-5' and so on.

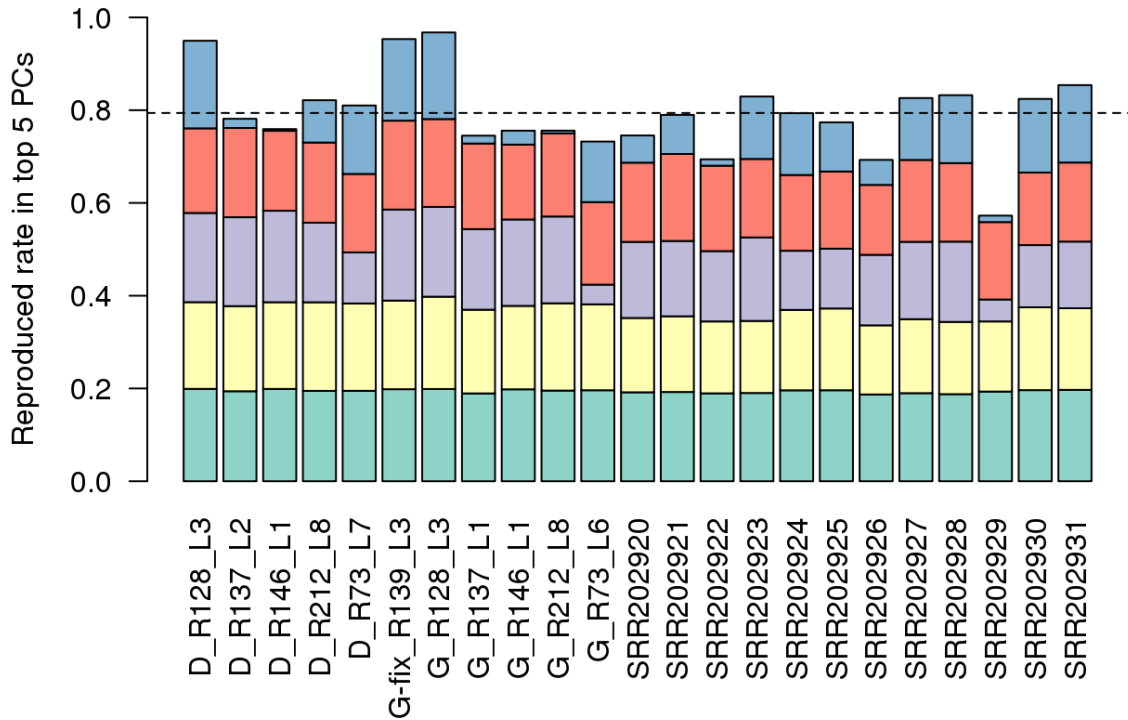

**Figure S4 | Reproducibility of five PCs**

The reproducibility of the five NP patterns using replicates of MNase-seq data is shown as series of stacked bar plots. The different colours of the stacked bars represent the reconstruction ratio (max=0.2) of PC1-5 from bottom to top. The reconstruction ratio was calculated by applying the inter-product of the five PCs and each reproduced PC1-5. The replicates were for C2C12 cells under growth (four replicates) (prefix “G”; middle part of the bars) and differentiation (four replicates) conditions (prefix “D”; left part) and Asp. data (with “SRR” prefix). G\_R128, D\_128 were used in main results and G-fix was also used in Figure 1b.

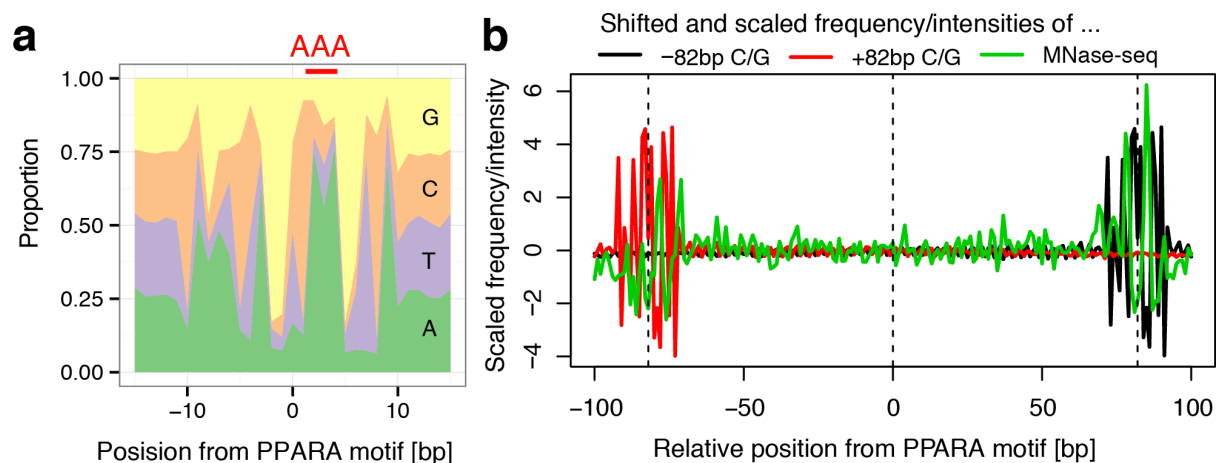

## Figure S5 | DNA sequence bias makes pseudo signal peak in MNase-Seq data

**(a)** The observed ratio of each nucleotide around the PPARA motif in the mouse genome. The x-axis indicates relative position from the PPARA motif center, ranging from -15 to +15 bp. The y-axis indicates proportion of observed nucleotides. The colour of the area indicates each nucleotide (G: yellow, C: orange, T: purple, A: green). The position of the highly biased AAA sequence that has high MNase digestion preference is marked at the top in red.

**(b)** The A/T digestion bias produces the spiky artifact seen in the MNase-Seq data. The MNase-Seq data of the C2C12 myoblast state was used for this example. The x-axis indicates relative position from the PPARA motif. To compare signals that have different scales, the y-axis is shown as centered and scaled (mean=0, s.d.=1) signal intensities/frequency of the nucleotide frequency of C/G. The black and red lines are the +82 or -82 bp-shifted C/G sequence frequency. The shift was the requirement for estimating nucleosome center. The highest MNase-Seq signal spikes appeared just between the shifted high C/G biased point (AAA).

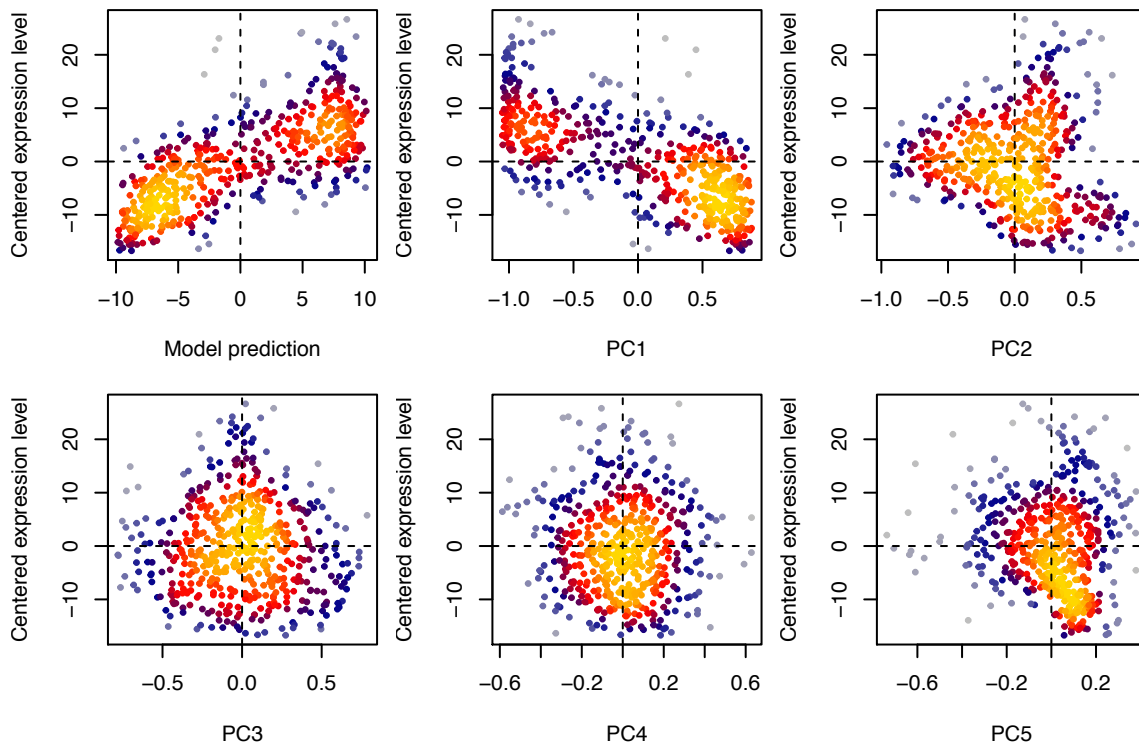

**Figure S6 | PC1 is a critical component to predict gene expression**

The scatterplots of PC scores and the scaled and centered average gene expression values are shown. The x-axis of first box (top-left) indicates predicted expression level by PCR, and the others indicate PC scores of each PC. The y-axis is the scaled and centered gene expression level. The density of the points is represented by colours, from grey (lowest), through blue, red, orange to yellow (highest).



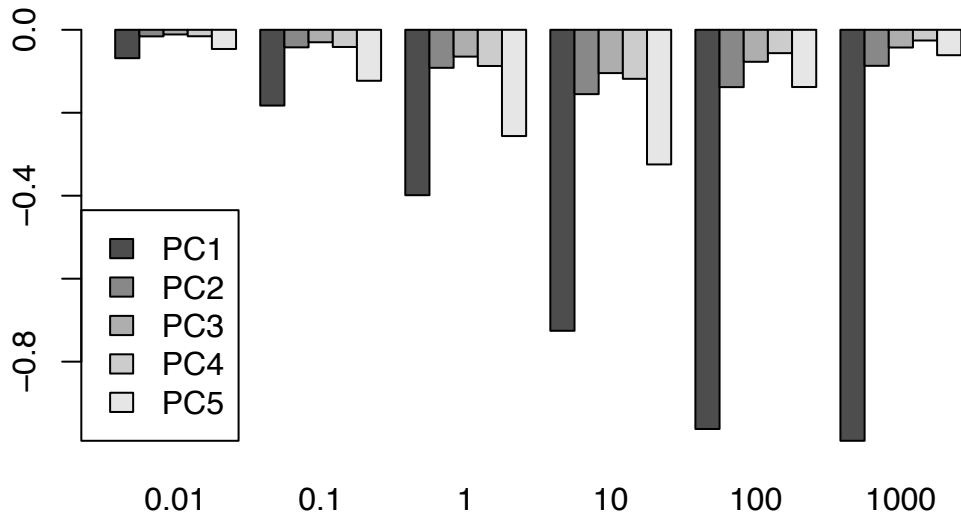

**Figure S7 | Ideal NP pattern for gene expression consists of PC1 and PC5**

The weights of five the PCs contained in the ideal NP pattern for gene expression derived by ridge regression analysis are shown. The height of bars (y-axis) indicates the dot product calculated between five PCs and each ideal NP pattern of  $\lambda$ . The bottom labels indicate the  $\lambda$  values used for each ridge regression model. The bars in each  $\lambda$  are in the order PC1-5 (black-grey).
